# Supplementary material for: Heterogeneous Network Edge Prediction: A Data Integration Approach to Prioritize Disease-Associated Genes
Source: PubMed Central journal article supplement (PMC4497619; doi:10.1371/journal.pcbi.1004259), 2015-07-09

### High Confidence Association:

Primary Gene: HLA-DRB1

Secondary Genes: HLA-DRA, C6orf10

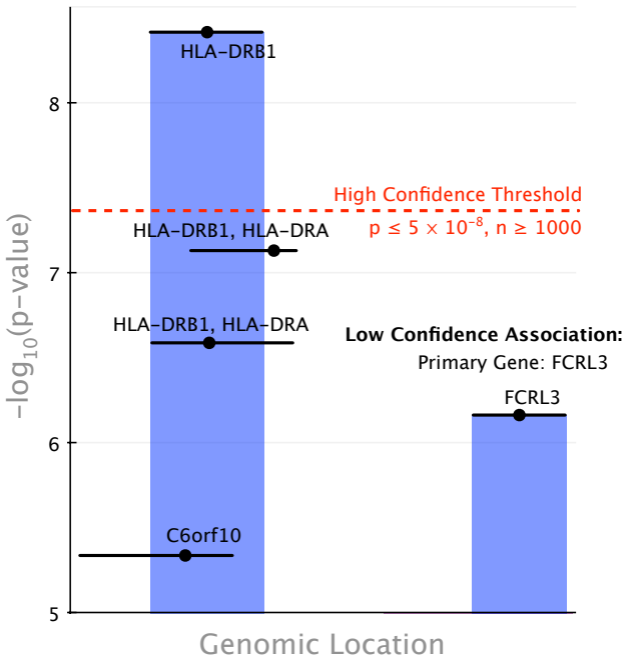

Supplement: pcbi.1004259.s001.pdf [file pcbi.1004259.s001.pdf]
