# Supplementary material for: Heterogeneous Network Edge Prediction: A Data Integration Approach to Prioritize Disease-Associated Genes
Source: PubMed Central journal article supplement (PMC4497619; doi:10.1371/journal.pcbi.1004259), 2015-07-09

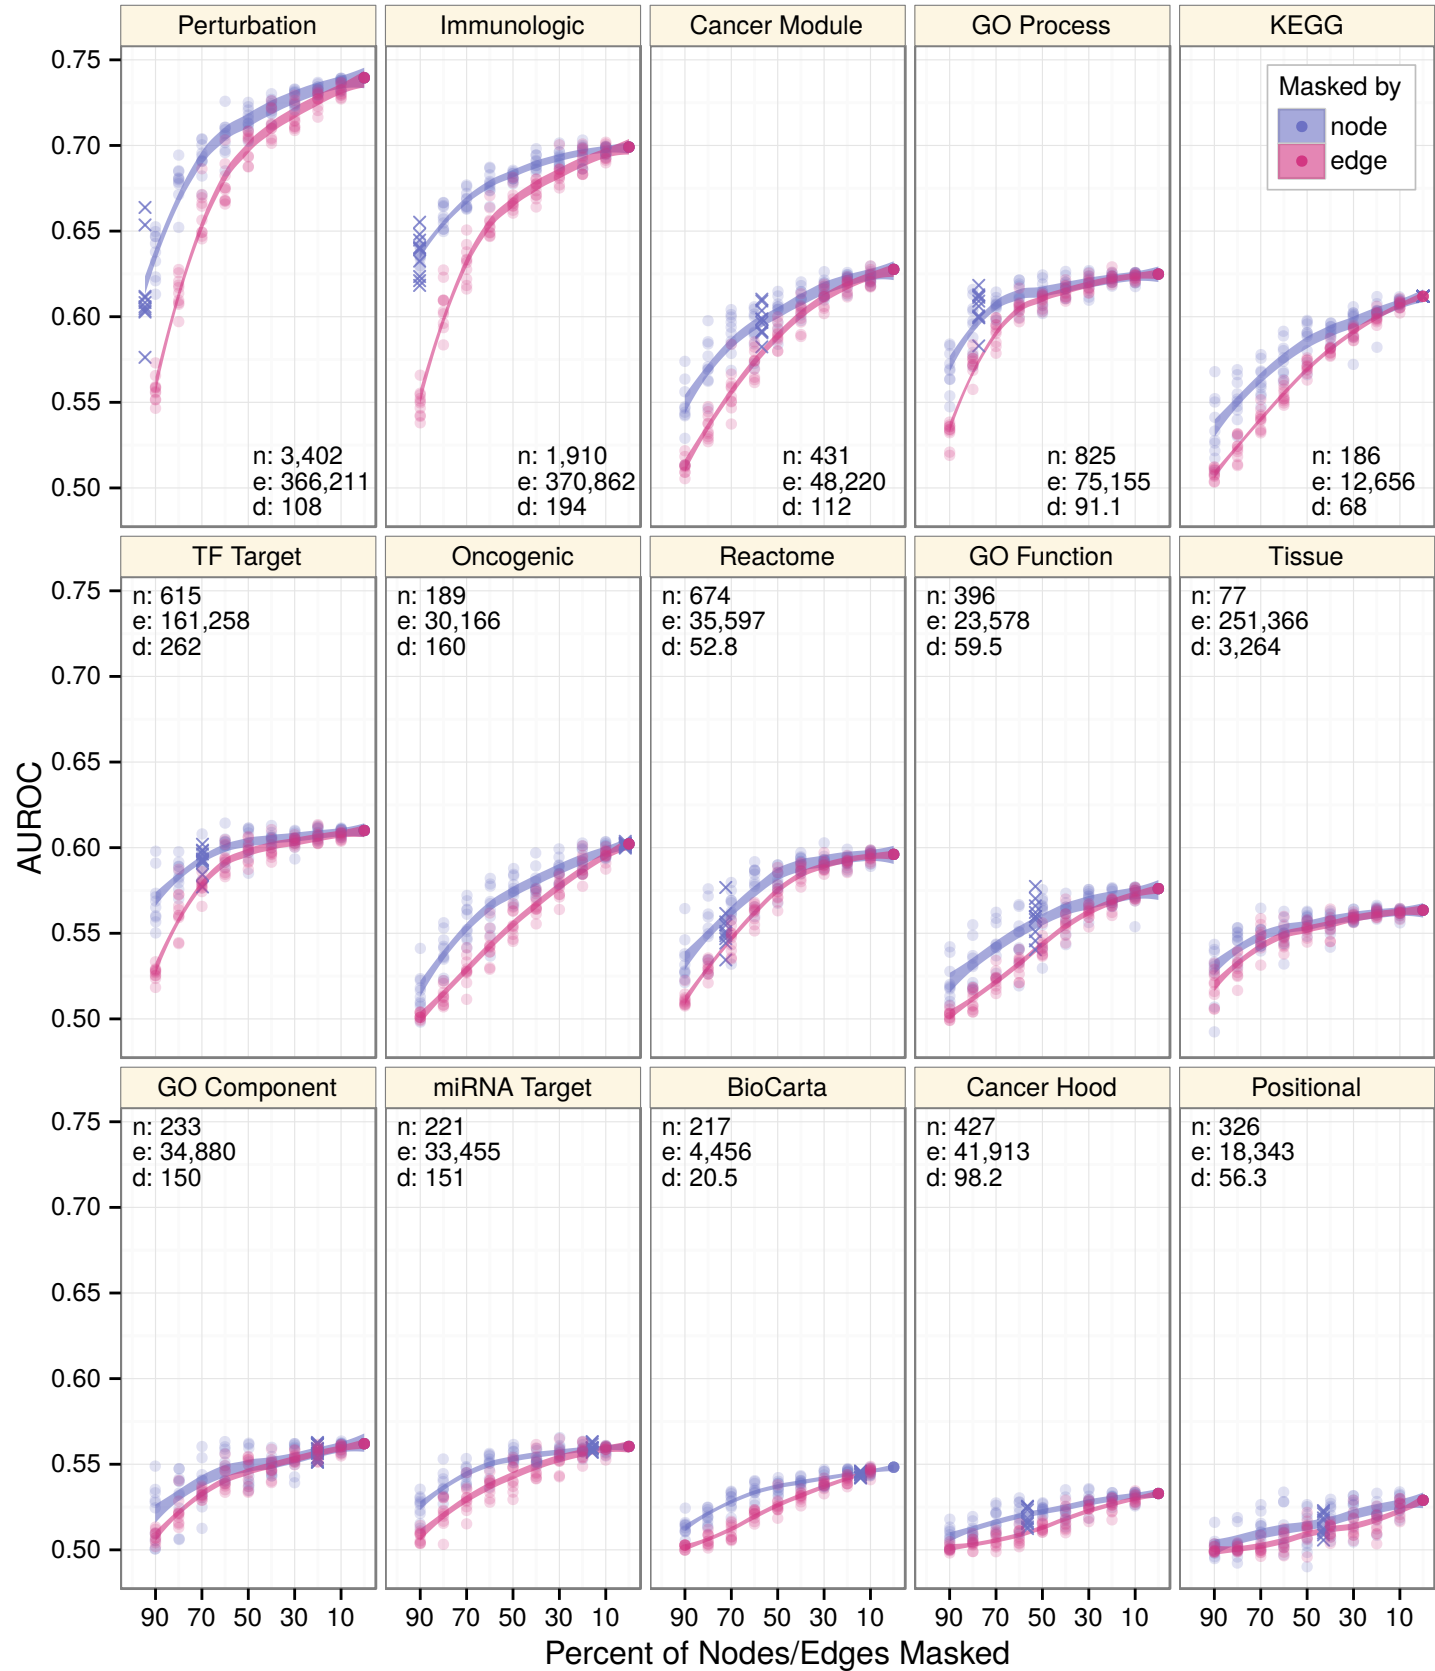

Supplement: pcbi.1004259.s007.pdf [file pcbi.1004259.s007.pdf]
