# Supplementary material for: Heterogeneous Network Edge Prediction: A Data Integration Approach to Prioritize Disease-Associated Genes
Source: PubMed Central journal article supplement (PMC4497619; doi:10.1371/journal.pcbi.1004259), 2015-07-09
Supplement: pcbi.1004259.s010.pdf [file pcbi.1004259.s010.pdf]

| <b>Path Count</b> | <b>Measures the number of ...</b>                                                                                                     |
|-------------------|---------------------------------------------------------------------------------------------------------------------------------------|
| GaD (any disease) | diseases that the source gene is associated with, ignoring the association with the target disease if present.                        |
| GaD (any gene)    | genes that the target disease is associated with, ignoring the association with the source gene if present.                           |
| <b>DWPC</b>       | <b>Measures the extent that ...</b>                                                                                                   |
| GeTID             | the source gene is expressed in tissues affected by target disease.                                                                   |
| GiGaD             | genes associated with the target disease interact with the source gene.                                                               |
| GiGiGaD           | genes associated with the target disease interact with genes that interact with the source gene.                                      |
| GaDaGaD           | genes associated with the same diseases as the source gene are associated with the target disease.                                    |
| GaDmPmD           | diseases with the same pathophysiology as the target disease are associated with the source gene.                                     |
| GaDITID           | diseases affecting the same tissues as the target disease are associated with the source gene.                                        |
| GeTeGaD           | genes expressed in the same tissues as the source gene are associated with the target disease.                                        |
| GiGeTID           | genes interacting with the source gene are expressed in tissues that are affected by the target disease.                              |
| {Positional}      | genes located in the same cytogenetic band as the source gene are associated with the target disease.                                 |
| {Perturbation}    | genes belonging to the same perturbation signatures as the source gene are associated with the target disease.                        |
| {BioCarta}        | genes involved in the same BioCarta pathways as the source gene are associated with the target disease.                               |
| {KEGG}            | genes involved in the same KEGG pathways as the source gene are associated with the target disease.                                   |
| {Reactome}        | genes involved in the same Reactome pathways as the source gene are associated with the target disease.                               |
| {miRNA Target}    | genes sharing 3'-UTR microRNA binding motifs with the source gene are associated with the target disease.                             |
| {TF Target}       | genes sharing transcription factor binding sites with the source gene are associated with the target disease.                         |
| {Cancer Hood}     | genes present in the same expression neighborhoods of cancer-related genes as the source gene are associated with the target disease. |
| {Cancer Module}   | genes belonging to the same cancer modules as the source gene are associated with the target disease.                                 |
| {GO Process}      | genes participating in the same GO Biological Processes as the source gene are associated with the target disease.                    |
| {GO Component}    | genes belonging to the same GO Cellular Components as the source gene are associated with the target disease.                         |
| {GO Function}     | genes contributing to the same GO Molecular Functions as the source gene are associated with the target disease.                      |
| {Oncogenic}       | genes belonging to the same cancer-dysregulated cellular pathways as the source gene are associated with the target disease.          |
| {Immunologic}     | genes belonging to the same immunologic signatures as the source gene are associated with the target disease.                         |
