# Supplementary material for: Heterogeneous Network Edge Prediction: A Data Integration Approach to Prioritize Disease-Associated Genes
Source: PubMed Central journal article supplement (PMC4497619; doi:10.1371/journal.pcbi.1004259), 2015-07-09
Supplement: pcbi.1004259.s011.pdf [file pcbi.1004259.s011.pdf]

| Feature           | AUROC | p-AUROC | p-value               |
|-------------------|-------|---------|-----------------------|
| <b>GaDmPmD</b>    | 0.643 | 0.547   | $1.6 \times 10^{-20}$ |
| <b>GiGaD</b>      | 0.558 | 0.514   | $2.1 \times 10^{-9}$  |
| {Perturbation}    | 0.740 | 0.667   | $2.3 \times 10^{-7}$  |
| <b>GeTID</b>      | 0.573 | 0.518   | $1.8 \times 10^{-5}$  |
| {KEGG}            | 0.613 | 0.566   | $5.6 \times 10^{-5}$  |
| <b>GaDaGaD</b>    | 0.633 | 0.592   | $1.5 \times 10^{-4}$  |
| {BioCarta}        | 0.548 | 0.526   | 0.001                 |
| {Reactome}        | 0.599 | 0.562   | 0.002                 |
| {Immunologic}     | 0.703 | 0.665   | 0.006                 |
| <b>GiGiGaD</b>    | 0.646 | 0.621   | 0.05                  |
| {Cancer Module}   | 0.629 | 0.612   | 0.11                  |
| GeTeGaD           | 0.570 | 0.554   | 0.14                  |
| {TF Target}       | 0.612 | 0.596   | 0.16                  |
| {GO Component}    | 0.560 | 0.547   | 0.17                  |
| {Positional}      | 0.529 | 0.520   | 0.19                  |
| GiGeTID           | 0.628 | 0.616   | 0.20                  |
| {GO Process}      | 0.626 | 0.617   | 0.26                  |
| GaD (any disease) | 0.683 | 0.676   | 0.30                  |
| {GO Function}     | 0.577 | 0.571   | 0.31                  |
| {Cancer Hood}     | 0.533 | 0.532   | 0.45                  |
| GaD (any gene)    | 0.620 | 0.620   | 0.49                  |
| GaDITID           | 0.674 | 0.674   | 0.49                  |
| {Oncogenic}       | 0.601 | 0.604   | 0.60                  |
| {miRNA Target}    | 0.562 | 0.569   | 0.72                  |
