# Supplementary material for: Heterogeneous Network Edge Prediction: A Data Integration Approach to Prioritize Disease-Associated Genes
Source: PubMed Central journal article supplement (PMC4497619; doi:10.1371/journal.pcbi.1004259), 2015-07-09
Supplement: pcbi.1004259.s012.pdf [file pcbi.1004259.s012.pdf]

|                                                           | Value  |
|-----------------------------------------------------------|--------|
| <b>Prediction Threshold</b>                               | 0.024  |
| <b>False Positive Rate</b>                                | 0.001  |
| <b>Recall</b>                                             | 0.108  |
| <b>Precision</b>                                          | 0.133  |
| <b>Lift</b>                                               | 68.4   |
| <b>Novel &amp; Meta2.5-nominal Total</b>                  | 1211   |
| <b>Novel &amp; <math>\geq</math> Prediction Threshold</b> | 19     |
| <b>Discovered</b>                                         | 4      |
| <b>Bonferroni Cutoff</b>                                  | 0.0125 |
| <b>Discovered &lt; Bonferroni</b>                         | 3      |
| <b>Total &lt; Bonferroni</b>                              | 199    |
| <b>Replication <math>p</math>-value</b>                   | 0.015  |
