# Supplementary material for: Heterogeneous Network Edge Prediction: A Data Integration Approach to Prioritize Disease-Associated Genes
Source: PLOS journal article supplement (doi:10.1371/journal.pcbi.1004259), 2015-07-09

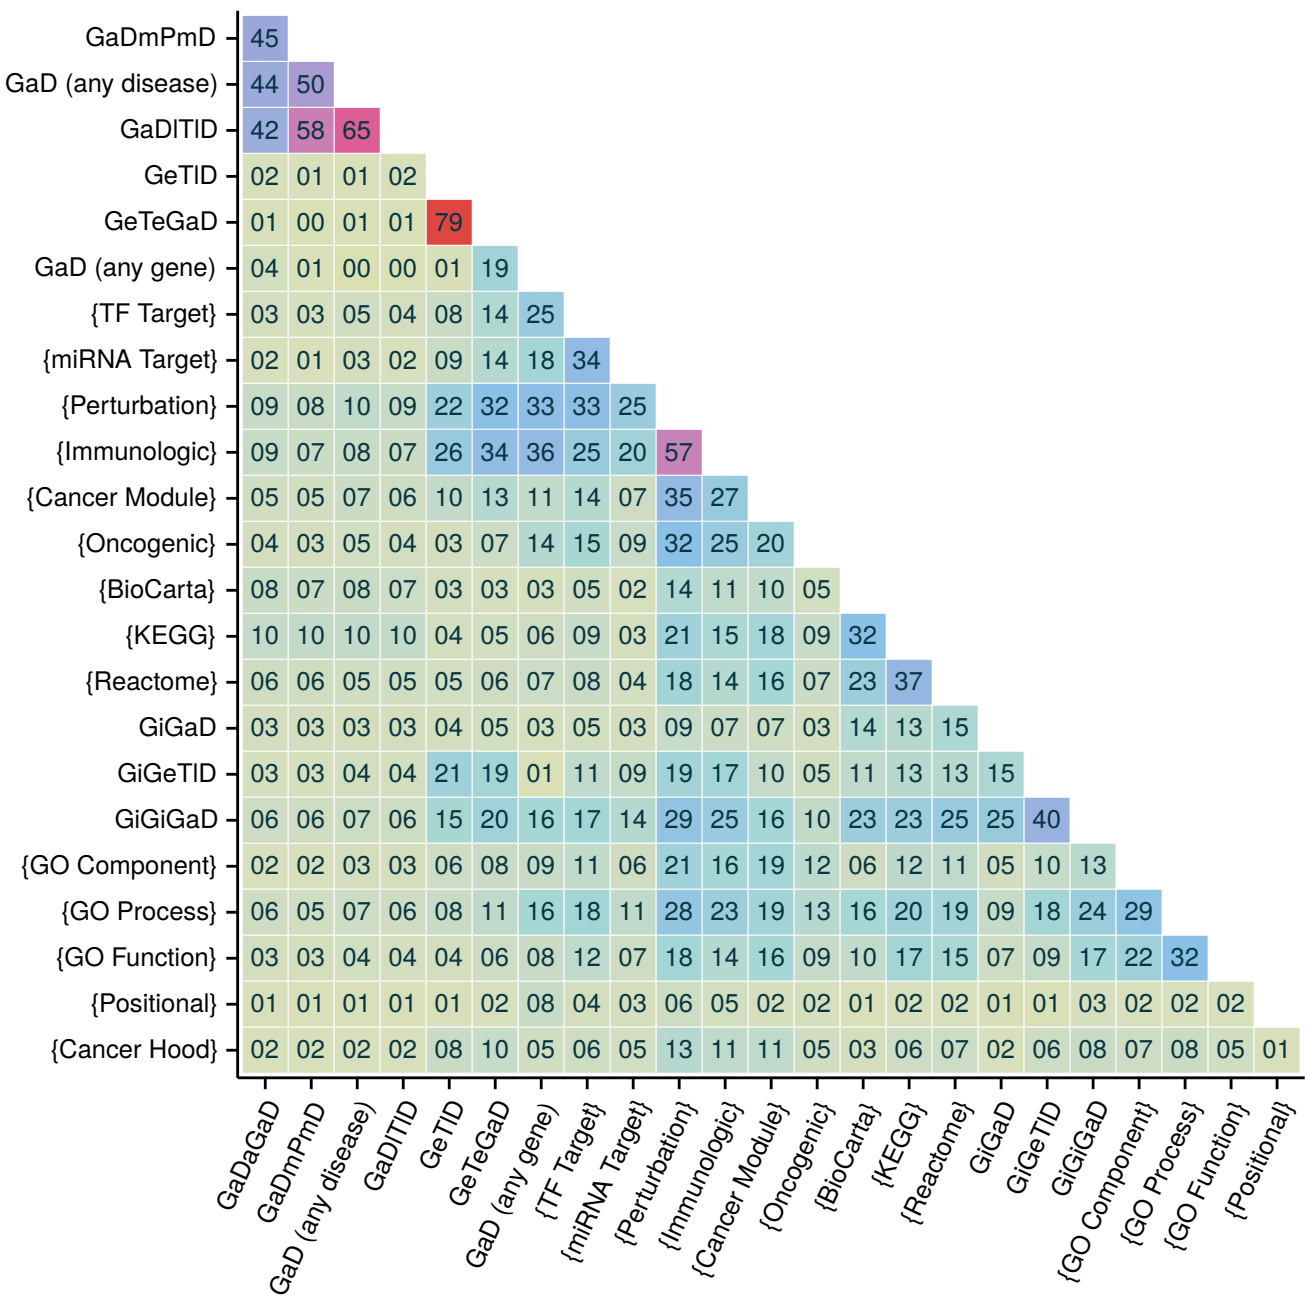

Supplement: S25 (10.1371/journal.pcbi.1004259.s025) [file journal.pcbi.1004259.s025]
