# Supplementary figures and images for: Heterogeneous Network Edge Prediction: A Data Integration Approach to Prioritize Disease-Associated Genes
Source: PLOS journal article supplement (doi:10.1371/journal.pcbi.1004259), 2015-07-09

## High Confidence Association:

Primary Gene: HLA-DRB1

Secondary Genes: HLA-DRA, C6orf10

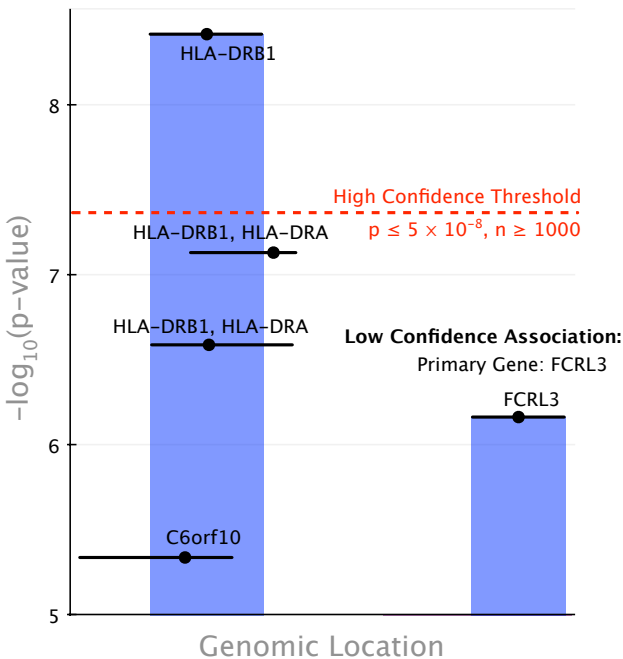

Supplement: S25 (10.1371/journal.pcbi.1004259.s025) [file journal.pcbi.1004259.s025]

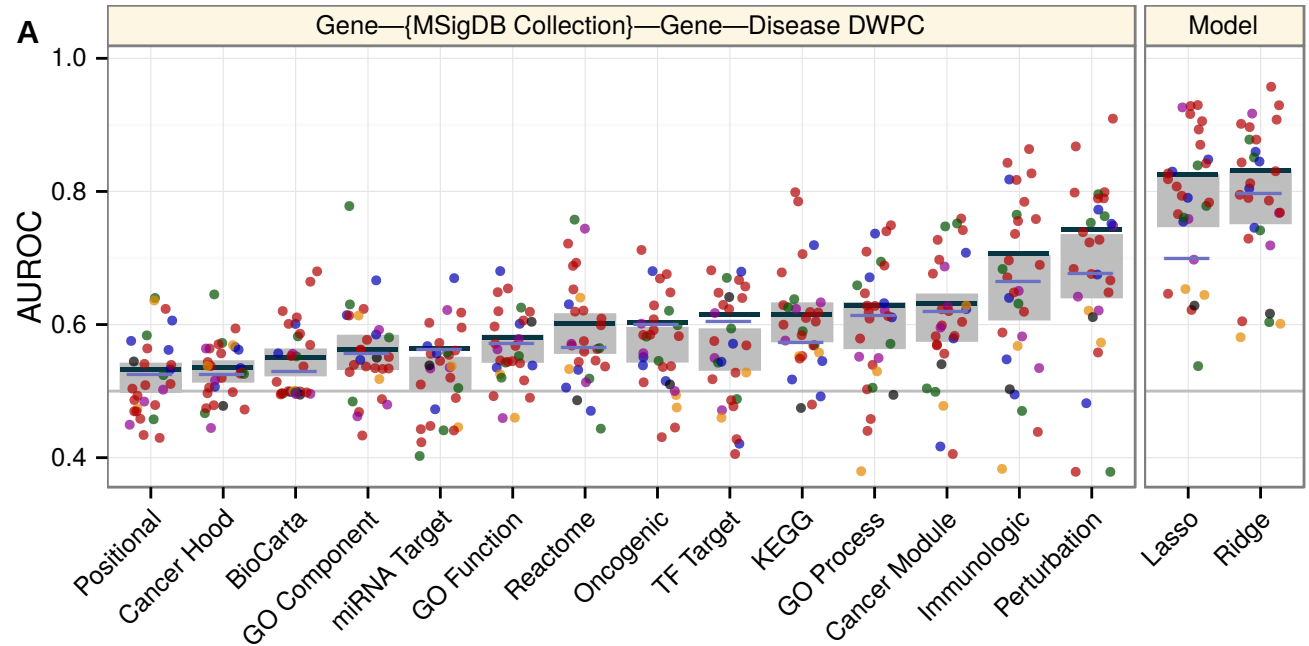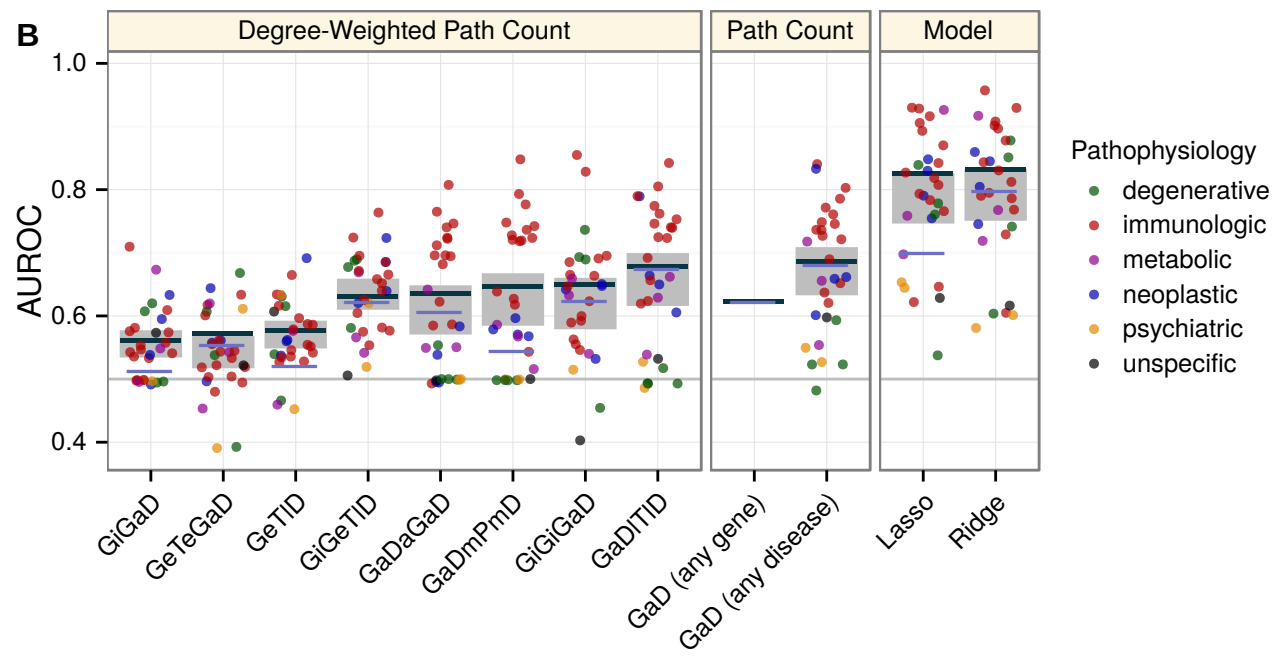

Supplement: S25 (10.1371/journal.pcbi.1004259.s025) [file journal.pcbi.1004259.s025]

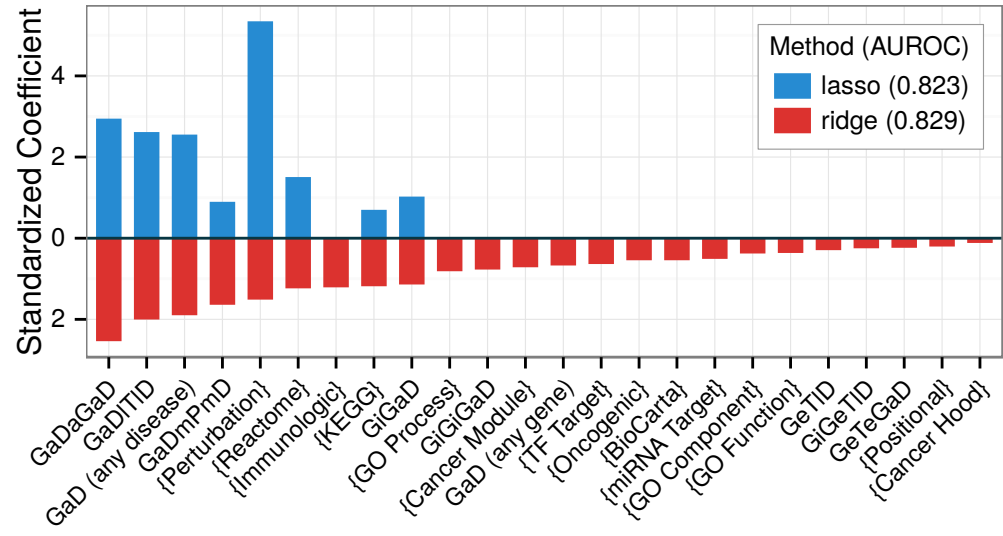

Supplement: S25 (10.1371/journal.pcbi.1004259.s025) [file journal.pcbi.1004259.s025]

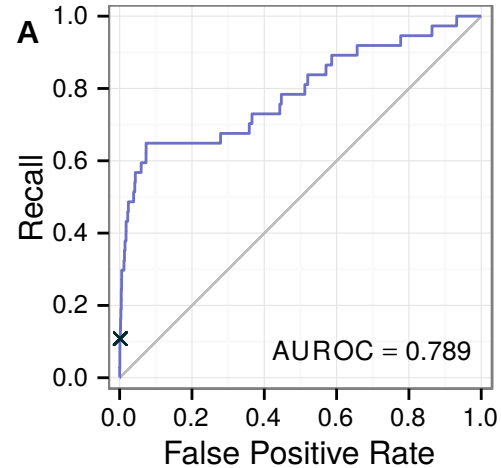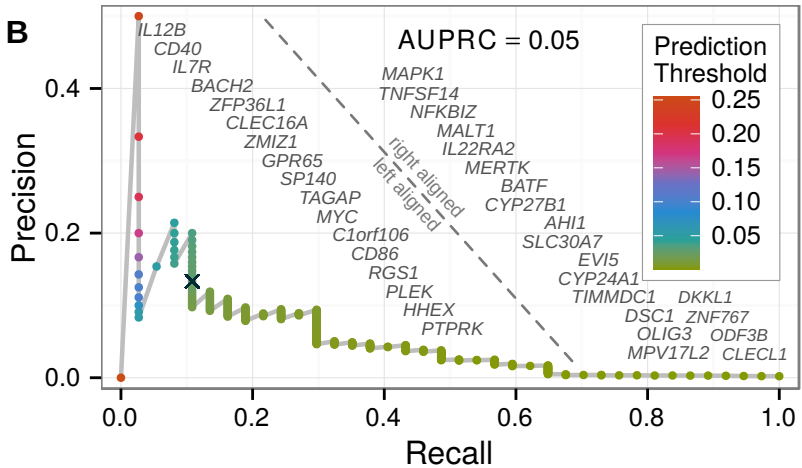

Supplement: S25 (10.1371/journal.pcbi.1004259.s025) [file journal.pcbi.1004259.s025]

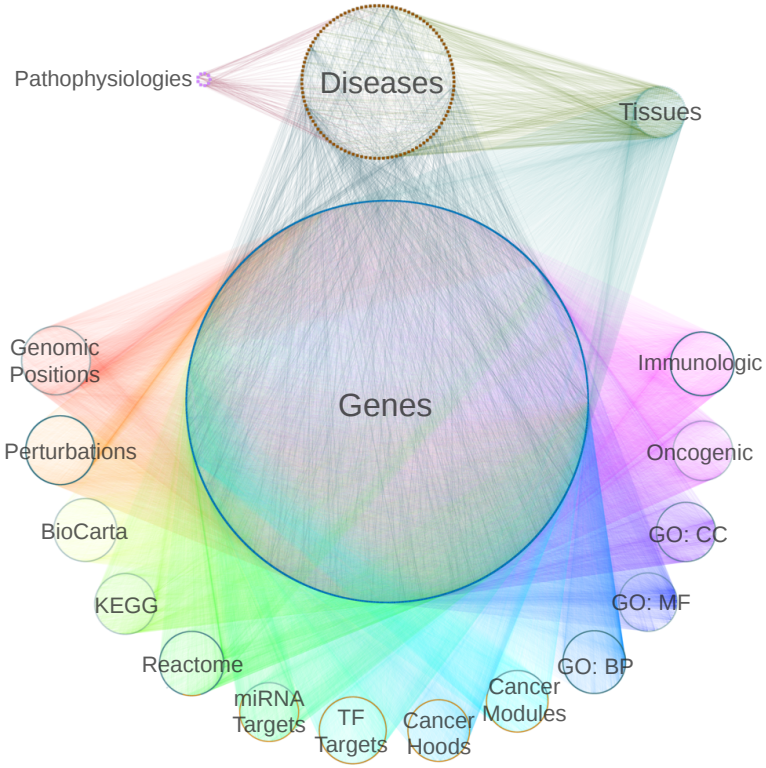

Supplement: S25 (10.1371/journal.pcbi.1004259.s025) [file journal.pcbi.1004259.s025]

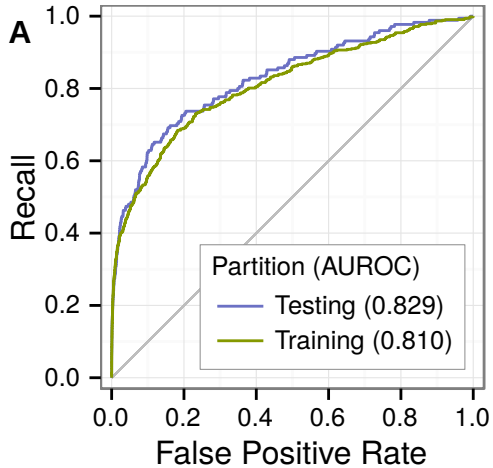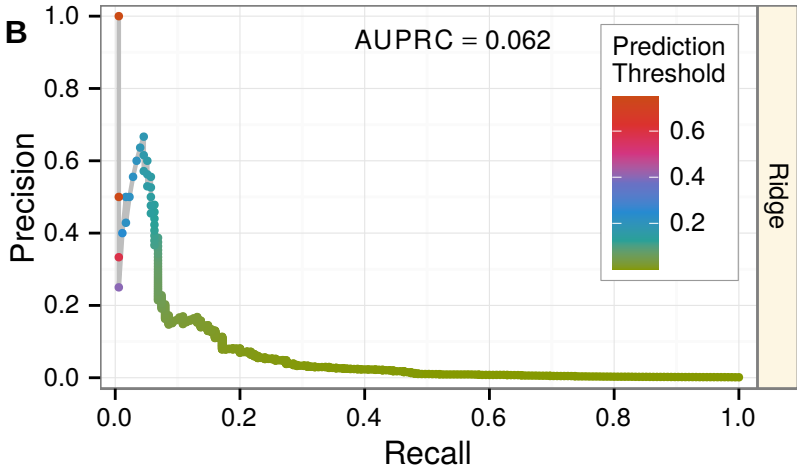

Supplement: S25 (10.1371/journal.pcbi.1004259.s025) [file journal.pcbi.1004259.s025]
